# Supplementary material for: Umgang mit Gewalt besser und mehr schulen
Source: Springer Nature journal article supplement (doi:10.1007/s00058-021-2025-0), 2021-04-30
Supplement: MOESM1 [file 19123832]

**Materialien des ZQP zum Download  
zum Beitrag „Umgang mit Gewalt besser und mehr schulen“  
von Annette Lübbers**

*Heilberufe (73) 5/2021, S. 50-52*

**Materialien des ZQP zum Download:**

<https://www.pflege-gewalt.de/beitrag/arbeitsmaterial-gewaltpraevention-pflegebeduerftige/>

<https://www.pflege-gewalt.de/beitrag/arbeitsmaterial-gewaltpraevention-heimbewohner/>

<https://www.zqp.de/methode-schattentage-pflege/>
